# Supplementary material for: Multi-step control of muscle diversity by Hox proteins in the Drosophila embryo
Source: Oxford University Press journal article supplement (doi:10.1242/dev.045286), 2010-01-08
Supplement: dev045286-sup-045286figs2.pdf [file dev045286-sup-045286figs2.pdf]

TGGCCGGGATAAAGTCGATGGCTTAAGCTTAGAGTTAGAATTTAGTAGGAGCACTAAATA  
TTAGGTTATAAATAGCTTGAACCTATTAACAATATTATACTATCAGCTTAAAAGTTAATA  
TTTATATTTAAGTACCATCCTTAAATCCACTTTGTGCCAGATAGAGCT**TGAAGTG**CTAT **Tin**  
CTTCTGTTCAATTGGCACTTTTTAGCCAATCGGGCAGAAACATTTAAGGACATTCCGAGC  
AGCTAAAAAACAATACTCCGTCCAATCGAAGAGAAAC**GCCGCCAA**GTCCGCCATCCC **Mad**  
CTCGC**CCA**AATATGAATGACCAATTATGCACTTCGTTGGCG**CTACGTG**ACCCGAGCTGCCA  
ATTTTGGGCCCATCGAAAATCCCAAACGGAGGTGTCC**CGATGT****CATGTGCG**AACA**TTTGA** **Tw**  
**TGATGCGTAGCTTTTT**CATTAAATGAAAATTT**CGCGT**TGCTGGCAAAACAAAAGGACAAAG  
AAGCGGCCAAAGGCGCTAACTTTGCTGGCAAATGGAAGGCCAAGAT**GGAGA****CACTTTGA** **dTCF**  
**TTATTGA****CAGGACGCGAGT****TGGAATTTTTAATTGCC****CCAAGT**GGTGGTGGTTGTCTAT **Tin**  
GGTTGGTTGGTTTTACCGAGGGAAAATCCTTGAATTGGTCAGGACTTGTGTTTTCGGTT  
AGATTTCCCCAAAATGCAATATCCTCGTCTTGAAGA**CATATG**CAAATGGGAGGGGGCACC **Tw**  
GCGTG**AATTTATGT****GTCTCTGTCAG**GATA**TTTTGAAAACATTGTAAT****CAAGCA**AGTCGAG  
GGCAGGATGCT**TTCCGAGAAAGTCAATTAGCTGCC**CATAAAAATGCAGGCTGGCCTCGAA  
GTGATGATGGCTCTGGTGTCTCGGGGATGAAGTCATCGCCGGGCAAGTGAATCATTATC  
CTGGAGGATCCCCCGTCTTAGA**CAC****TCGAT****CGTATTCAAATTTCA****AACTGCAGTTGCA** **Ets, Tw**  
**TCTGTGAG**TTTCCACGTTCTGTTGCCGCACC**GTAAT****TCGATATTG****TATCTGACAGATA**TAC  
ACGGCTCTCAAATCTCGAGGGATGGCGCACTGGATTGCTTGTGTTAATGATGATGAGCCC  
GCTCCGATGCTCTTTTTTTTTCCGTAATGGATAACATCCATCCACATCT**CA****CATCTG**TTTT **Tw**  
TTCTTCGCAAAAGTCCAACAAGTTCACAGGCATTCTCGATAAGCACCACTTGGCTTTTTA  
ATGCTGAATATACAAGTAATACAATACAATTTATTTTAGTAAGCCGAAGTTTCTATGCC  
CTAGCAATTTTAGAATTTAGCAATTTATTTACATATTTGTAATAACAAGTTTTATCA  
TTATGTTTATGAAGTATGGTATACTATAGTACTATATTTAAAAAGGTATCTAGTTCAATT  
TGAGAT**C**TATTGTATATAGAAAA**C**CTTGGTGATTTCGTTACTATA**A**CTTTAAAA**CC**CGT  
TTTCAGGGTATAAGTTTTTACGCATAAAACTAATAAATAACTTGTTTACACTTTGTGATTT  
GGACTTATTGGATACTACTCAATGGTTTTAGTTTTATCAGTGTTAATAGAAAATATTGCTT  
TTAGTGGTTATCTCGAGTGCCAGTTTCTTATCGCCCGCTCAGAGATTTATATGCTTTAGA  
AATTCAAAGAGCAAAGAGCTATTTAGGCTGAAGTTTTTATAGGGAGACCGAATT**ATTAA**  
**AAAAAAAAAAAAACAAG**TGTCGGAAGTATAAA**CA**AATTTGCGACACTCCCATCGGACAAG  
GA**CATATG**CAGATGCCACCCGCTGGCCAGAGATCAACCCTCCAGCT**TGCCTGCTAATTTGT** **Tw**  
**TCAATTTGT****CGAGTGG****CAACAAC**GGAGAAAAAATATGATGAAAA**TTGCCGGCACAACGC**  
CGCCGCTTTTCCATCTCTCCCCCCCCCCCCCATCGT**GATCGGAAAGG****AAAATATTATT**  
**TCGGCAAATAAAA**AGTTGGCAGGGGATTT**CAGATAGGGCGTATCATGT**CGCCGGCGGATG  
CATAAAAGTATTT**CAG****CATTTAAATGC**AACGCACACGGGTGT**CAG**TTT**C**ATTGGATTGG **Mef-2**  
TTTCGAGACGGATTGGGTTGGGTTGCGCTGGGCTAACAGGCTCAC**ATCCT****GGCCGCAGGA**  
**CA**TTTCGCCGGCTGT**CACCC**ACTTATCGCAGTGGCACTCACTACCGCCGGGCCAAA**CA** **Tw**  
**TC****TG**CCCAGAAAAGCCAAGCTAACC**GGCA****CAAGTGGCAGCA****AAAAAGCG****CAACC**CGT**CAT**  
TAGCGGCTCGTAAAGTCGCCTTCGAGGAGGCGAACATCGTAAAGACTCTTAATTGAAGCT  
GGCATAAATCCACA**ACTGATTGATAATTGCCAGCACAATGGGAAAAACGAGTCCAATGCC**  
ATTTATGGTCCATCCTCAGTCTGCCCTCACAAATAGAATAGCTGCAGGAATGGTT
