# Supplementary material for: Multi-step control of muscle diversity by Hox proteins in the Drosophila embryo
Source: Oxford University Press journal article supplement (doi:10.1242/dev.045286), 2010-01-08
Supplement: dev045286-sup-045286figs4.pdf [file dev045286-sup-045286figs4.pdf]

CTCGAGAGCGAGCTGGAAACTAATTA<sup>Hox<sup>2</sup></sup>AAATGTTTCGCGCCTCAAATTTCC<sup>Twi</sup>TTCGCTCGCC  
TTATTTATGACCCTGTGAATGTCTTGCATATGGACGGAGTTGAGATCCTTCTCGTTTTCT  
TCCTTTTTTTTGTTFACGAGTGC<sup>Twi</sup>AAATGGGACATTTACATGC<sup>Twi</sup>GAGTCAGTTTGCATATTG  
GAATTATTCATGGTTTCTTTAAAGATGGCGCAGGATGTGATGTCGCGGGAAAAGGATGAG  
GGTTTCCTCAAGGAAGTCGGAAATAGAAGTGGTTTTCTTTTCATGCTACCAATATGGGGGC  
ACATAAACTTGCATTTGATGAGCTAAATGTAAACATACTAATTTAAATACATTTTTTA  
TGATAAGTGAAC<sup>Twi</sup>TAAAGTCACTAACTTTTAAAAATTTGATTGACTTCTACAATGTGT  
GTTGTTTAATTTCTTATTTTATATTTTAAATATCGAAAATCTACAAATCCGCTTATG  
TTTAAAAGTCAAGCCGCTGGCTAATTGACAAAATGTGTAATTGTGGCGATGAGAGTCCTT  
CCGATTGTCACTCTCCAACCCTCCGTAATCCCCTAAGTCACCATAGGGGTGGGTA  
ATCAAATGCGGAGAAATGTACCAACAAATTTATTTAGCAATTTGGCTAGTGC<sup>Twi</sup>CGCTAGTCCGGC  
GCCATGTAAATCCAATGTAAACAATTGAAATCAAATTCGGGGGCATCGCCACCGAAAG  
GGGTGGCATGGGTAAAGGGTCATGGTGTCCATGACAGCTGT<sup>Nau</sup>CGGGC<sup>Nau</sup>CGGGAAACTC  
CACTGAGGATTGGCGCTGATAAAAAGGGGTTAATCGAACACGCGGACCACAGCTTTTGGAT  
GGAATTTCTTACCTTTGCCGAAAAAGAAAATTTATTTGTCAAAGGGCGTGGAATTTCC  
CGTTCTGGTTATTTGGTTAATTA<sup>Hox<sup>1</sup></sup>CGCATGTCTGGGGACATCTT<sup>Col</sup>CAGTCTGCTCTTTTC  
GCCTTTGATTTACACATAAAATTTTGTGCGACCTAGCAGCTCTGGGGAAATGTTTCCAGA  
ACTTCTCAAAAATAGACCAACAAGTGTGGGTGTGGGGAAAATTCGGGAAAAGAGTTGCC  
GTCTTGTGGTTAACGGAGTTTTCGGTCTTGTGTCAGAAGTTAATGAGATTA<sup>Mef-2</sup>CCACGCCCC  
CCAAATTAATTCACGGAAAGTCAAACAAGCTCTCTCTTTCCCTCGTCCATTCAATCG  
GTCACAGGCAGAAACCGCAAATGCGGAAAATGCAAATGTTTTCATGCGAACCAGAAC  
CTCAAAAACCAATGCCATCCCCTGACCTTTTTTTCACCTTTTGTTCCTAACGAGGCGTG  
AAAA<sup>Mef-2</sup>TTTTGTGGGCGGTTCCGGTAACTAATCCCTTGTGTTGGAAGAGAAAGGAAGAG  
GCATTTGGATGCGAAGGTATGCCTATAGGCACTCAACTCTGTTTGGACAACTTCTTCTGC  
CTAAATTATGTGCGAAAGTCAAGAGGTTAAACCCGAAAATGATGACTAATCAAGTCTGT  
GCTTACAACAAATTTATAAAACAAAAGGCAAGATATAAAGGGAAGAAAGTGAAC<sup>Mef-2</sup>TATGAA  
ACAAACAACAGGATTACAAC<sup>Mef-2</sup>TGCTTTACGTACATATAACTATAACTTCATATCGAAAA  
CATTATGAATGTAATTATGTACGTTTCGTTATACATGTAATAGAAAAGCGATACATCATT  
AATGTATTAATGTGTTATTTTTTATCTAAAAAGTCACAGAAGAATTC
