# Supplementary figures and images for: Multi-step control of muscle diversity by Hox proteins in the Drosophila embryo
Source: Oxford University Press journal article supplement (doi:10.1242/dev.045286), 2010-01-08

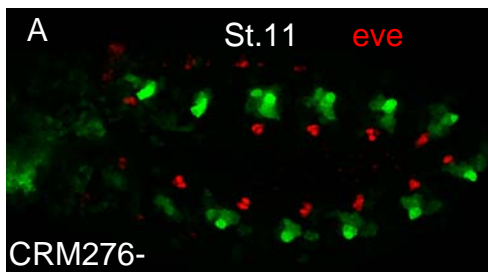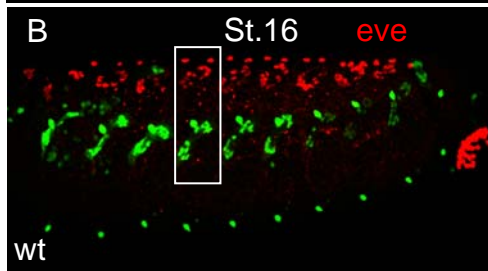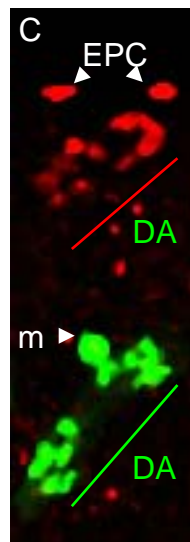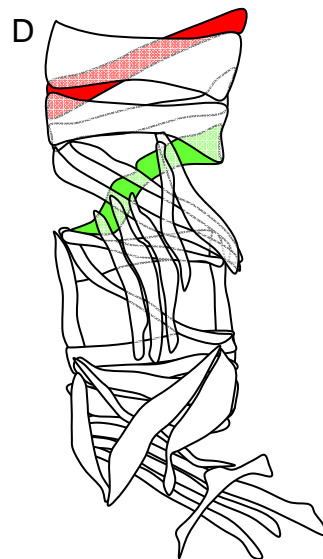

Supplement: dev045286-sup-045286figs1.pdf [file dev045286-sup-045286figs1.pdf]

4\_0.9-lacZ

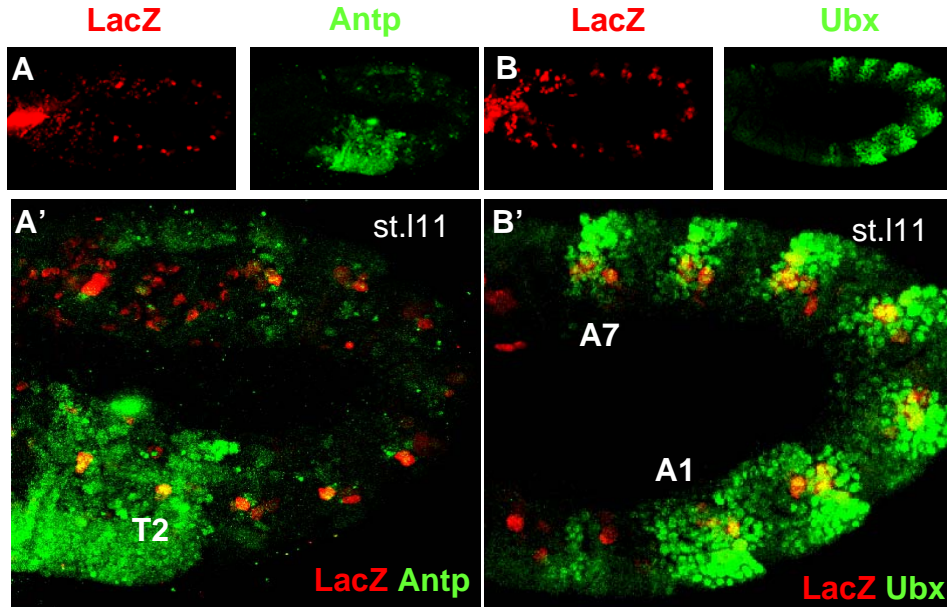

rP298-lacZ

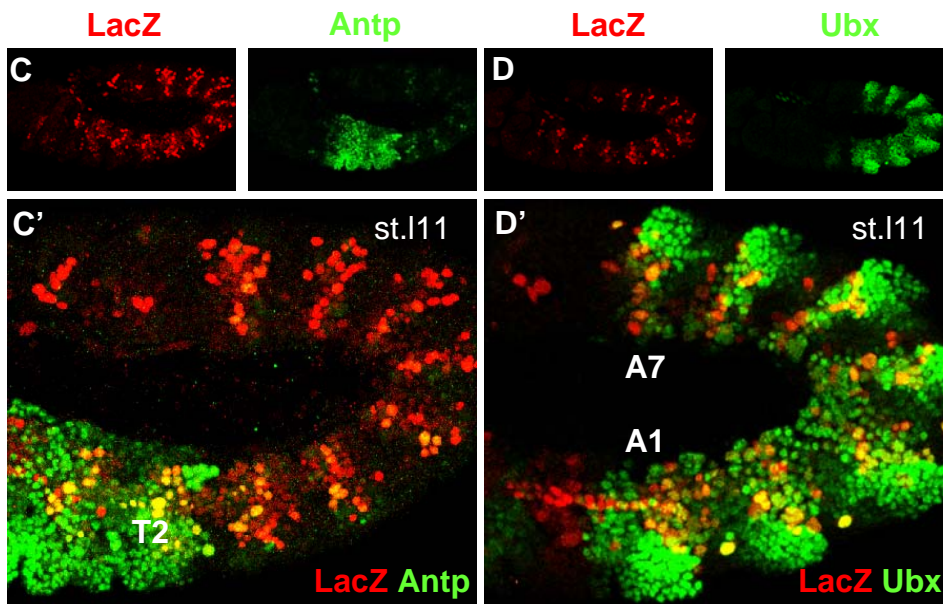

Supplement: dev045286-sup-045286figs3.pdf [file dev045286-sup-045286figs3.pdf]
